# Supplementary material for: Tracking neonicotinoids following their use as cotton seed treatments
Source: PeerJ. 2019 Apr 19;7:e6805. doi: 10.7717/peerj.6805 (PMC6476295; doi:10.7717/peerj.6805)
Supplement: Supplemental Information 1 — Raw data for imidacloprid and thiamethoxam concentrations in individual leaf tissue and soil samples from field sites. [file peerj-07-6805-s001.xlsx]

## Sheet: Sheet1
Table S-1 Detected concentrations of imidacloprid and thiamethoxam in individual leaf tissue (ng/g) from field sites.
Site	Sampling Date	Sample ID	Treatment	Concentration (ppb)
Kress	2014-06-03	Cot-002	Imidacloprid	13677
		Cot-004	Thiamethoxam	7190
		Cot-005	Thiamethoxam	19523
		Cot-007	Imidacloprid	4981
		Cot-011	Thiamethoxam	4019
		Cot-012	Imidacloprid	13276
		Cot-014	Thiamethoxam	11741
		Cot-015	Imidacloprid	28465
Chillicothe	2014-06-04	Cot-017	Thiamethoxam	4281
		Cot-018	Imidacloprid	3236
		Cot-022	Thiamethoxam	1291
		Cot-023	Imidacloprid	2600
		Cot-026	Imidacloprid	2105
		Cot-027	Thiamethoxam	1228
		Cot-029	Thiamethoxam	4018
		Cot-031	Imidacloprid	1311
Lamesa	2014-06-10	Cot-034	Imidacloprid	821
		Cot-035	Thiamethoxam	15303
		Cot-037	Thiamethoxam	4358
		Cot-038	Imidacloprid	1182
		Cot-042	Imidacloprid	3518
		Cot-044	Thiamethoxam	5596
		Cot-046	Imidacloprid	1610
		Cot-048	Thiamethoxam	2103
Wall	2014-06-18	Cot-050	Imidacloprid	1232
		Cot-051	Thiamethoxam	4172
		Cot-052	Thiamethoxam	2811
		Cot-054	Imidacloprid	2149
		Cot-055	Imidacloprid	1707
		Cot-056	Thiamethoxam	3054
		Cot-059	Imidacloprid	658
		Cot-060	Thiamethoxam	2900
Chillicothe	2014-06-19	Cot-061	Thiamethoxam	125
		Cot-062	Imidacloprid	197
		Cot-066	Thiamethoxam	155
		Cot-067	Imidacloprid	425
		Cot-070	Imidacloprid	92
		Cot-071	Thiamethoxam	0
		Cot-073	Thiamethoxam	0
		Cot-075	Imidacloprid	0
Wall	2014-06-23	Cot-078	Imidacloprid	0
		Cot-079	Thiamethoxam	0
		Cot-080	Thiamethoxam	0
		Cot-082	Imidacloprid	0
		Cot-083	Imidacloprid	0
		Cot-084	Thiamethoxam	59
		Cot-087	Imidacloprid	0
		Cot-088	Thiamethoxam	0
Lamesa	2014-06-18	Cot-090	Imidacloprid	622
		Cot-091	Thiamethoxam	27
		Cot-093	Thiamethoxam	185
		Cot-094	Imidacloprid	260
		Cot-098	Imidacloprid	0
		Cot-100	Thiamethoxam	17
		Cot-102	Imidacloprid	102
		Cot-104	Thiamethoxam	642
Halfway	2014-06-11	Cot-105	Thiamethoxam	0
		Cot-106	Imidacloprid	0
		Cot-110	Thiamethoxam	0
		Cot-111	Imidacloprid	5
		Cot-114	Imidacloprid	18
		Cot-115	Thiamethoxam	0
		Cot-117	Thiamethoxam	59
		Cot-119	Imidacloprid	0
Table S-2 Detected concentrations of imidacloprid and thiamethoxam in soil (ng/g) from field sites.
Site	Sampling Date	Sample ID	Treatment	Concentration (ppb)
Chillicothe	2014-06-04	Soil-017	Thiamethoxam	44
		Soil-018	Imidacloprid	43
		Soil-022	Thiamethoxam	7.7
		Soil-023	Imidacloprid	22
		Soil-026	Imidacloprid	6.2
		Soil-027	Thiamethoxam	5.7
		Soil-029	Thiamethoxam	22
		Soil-031	Imidacloprid	68
Lamesa	2014-06-10	Soil-034	Imidacloprid	17
		Soil-035	Thiamethoxam	15
		Soil-037	Thiamethoxam	104
		Soil-038	Imidacloprid	5.2
		Soil-042	Imidacloprid	593
		Soil-044	Thiamethoxam	15
		Soil-046	Imidacloprid	35
		Soil-048	Thiamethoxam	125
Wall	2014-06-18	Soil-050	Imidacloprid	11
		Soil-051	Thiamethoxam	8.3
		Soil-052	Thiamethoxam	7.5
		Soil-054	Imidacloprid	17
		Soil-055	Imidacloprid	21
		Soil-056	Thiamethoxam	29
		Soil-059	Imidacloprid	17
		Soil-060	Thiamethoxam	9.5
Chillicothe	2014-06-19	Soil-061	Thiamethoxam	69
		Soil-062	Imidacloprid	23
		Soil-066	Thiamethoxam	6.1
		Soil-067	Imidacloprid	18
		Soil-070	Imidacloprid	62
		Soil-071	Thiamethoxam	2.4
		Soil-073	Thiamethoxam	55
		Soil-075	Imidacloprid	7.4
Lamesa	2014-09-29	Soil-1002	Imidacloprid	0.8
		Soil-1003	Thiamethoxam	5.1
		Soil-1005	Thiamethoxam	6
		Soil-1006	Imidacloprid	17
		Soil-1010	Imidacloprid	1.8
		Soil-1012	Thiamethoxam	3.8
		Soil-1014	Imidacloprid	1.1
		Soil-1016	Thiamethoxam	4.7
Wall	2014-09-29	Soil-1018	Imidacloprid	3.7
		Soil-1019	Thiamethoxam	11
		Soil-1020	Thiamethoxam	12
		Soil-1022	Imidacloprid	5.1
		Soil-1023	Imidacloprid	9.1
		Soil-1024	Thiamethoxam	7.7
		Soil-1027	Imidacloprid	15
		Soil-1028	Thiamethoxam	7
Halfway	2014-10-01	Soil-1029	Thiamethoxam	10
		Soil-1030	Imidacloprid	231
		Soil-1034	Thiamethoxam	26
		Soil-1035	Imidacloprid	74
		Soil-1038	Imidacloprid	79
		Soil-1029	Thiamethoxam	29
		Soil-1041	Thiamethoxam	15
		Soil-1043	Imidacloprid	9.5
Kress	2014-10-01	Soil-1046	Imidacloprid	140
		Soil-1048	Thiamethoxam	13
		Soil-1049	Thiamethoxam	8
		Soil-1051	Imidacloprid	3.2
		Soil-1055	Thiamethoxam	13
		Soil-1056	Imidacloprid	7
		Soil-1058	Thiamethoxam	12
		Soil-1059	Imidacloprid	2.4
